# Supplementary material for: Aging-based molecular classification and score system in ccRCC uncovers distinct prognosis, tumor immunogenicity, and treatment sensitivity
Source: Front Immunol. 2022 Aug 11;13:877076. doi: 10.3389/fimmu.2022.877076 (PMC9402984; doi:10.3389/fimmu.2022.877076)
Supplement: Supplementary Table 4 — The information of prognostic aging phenotype-associated genes in TCGA-KIRC cohort. [file Table_4.xlsx]

## Sheet: Sheet1
ID	HR	HR.95L	HR.95H	pvalue
ACADL	0.734974	0.67217	0.803645	1.41359e-11
ACADM	0.634083	0.556435	0.722567	8.17763e-12
ACADSB	0.568419	0.486202	0.664538	1.37395e-12
ACE2	0.820338	0.7712	0.872606	3.30007e-10
ADCY9	0.61493	0.521056	0.725717	8.75769e-09
ADD3	0.655587	0.557723	0.770622	3.07473e-07
AKR7A3	0.775034	0.699293	0.858978	1.19078e-06
ALDH1L1	0.807254	0.749841	0.869062	1.28305e-08
ALDOB	0.870199	0.819868	0.92362	4.79014e-06
AMD1	0.600453	0.510557	0.706178	7.08632e-10
AMN	0.820452	0.756175	0.890192	1.99001e-06
AMOT	0.614157	0.536065	0.703624	2.12554e-12
ANKRD33B	0.708932	0.628456	0.799712	2.19956e-08
APOLD1	0.738081	0.673263	0.809139	9.42809e-11
APOM	0.816909	0.743233	0.897888	2.74688e-05
ARHGAP42	0.697281	0.608355	0.799205	2.21944e-07
ARHGEF15	0.735861	0.646688	0.837329	3.26028e-06
ARL4C	1.2264	1.08951	1.3805	0.000726238
ASAH1	0.610292	0.518979	0.71767	2.34651e-09
ATP11A	0.762841	0.691785	0.841195	5.74647e-08
B3GALNT1	0.709453	0.604638	0.832439	2.57165e-05
BAIAP2L1	1.37542	1.2024	1.57334	3.36583e-06
BLOC1S5	0.671269	0.562758	0.800702	9.39391e-06
BNIP3	0.743281	0.646894	0.85403	2.83191e-05
BOC	0.682616	0.582081	0.800515	2.63849e-06
C12orf49	0.646691	0.541057	0.77295	1.66548e-06
C1orf210	0.747981	0.685908	0.815671	5.05319e-11
CALCRL	0.718701	0.644627	0.801285	2.65135e-09
CCDC85A	0.50509	0.406531	0.627542	6.9612e-10
CCND1	0.781049	0.699732	0.871817	1.05559e-05
CCNG1	0.658834	0.571415	0.759626	9.18139e-09
CD34	0.713881	0.633023	0.805066	3.90023e-08
CD36	0.83646	0.75734	0.923845	0.000427681
CHST9	0.791756	0.701315	0.89386	0.000161265
CLEC14A	0.720324	0.645084	0.804339	5.60137e-09
CLEC18C	0.823025	0.742586	0.912178	0.000205879
CLIC4	0.789407	0.700601	0.88947	0.000102935
CLIC5	0.69435	0.607039	0.794218	1.03597e-07
CNNM3	0.636337	0.524995	0.771292	4.10039e-06
COL6A3	1.19047	1.07482	1.31858	0.000826885
CRIM1	0.697757	0.61467	0.792076	2.64608e-08
CXCL13	1.18753	1.09735	1.28511	1.99561e-05
CYP4A11	0.872098	0.825811	0.920981	8.73047e-07
CYP4A22	0.817725	0.74627	0.896021	1.6081e-05
CYYR1	0.672554	0.597038	0.757622	6.67801e-11
DDIT4L	0.851771	0.776049	0.934882	0.000731532
DIP2C	0.595143	0.498604	0.710373	9.09124e-09
DPP4	0.816533	0.754743	0.883382	4.45457e-07
DSG2	0.731216	0.644437	0.82968	1.19328e-06
DYSF	0.738672	0.653229	0.83529	1.36821e-06
EDN1	0.830225	0.758694	0.908499	5.17741e-05
EDNRB	0.707768	0.643713	0.778197	9.25154e-13
EFNA5	1.25212	1.13997	1.3753	2.64893e-06
EFNB2	0.710461	0.631062	0.79985	1.57204e-08
EIF4EBP2	0.515705	0.42867	0.62041	2.19273e-12
ENPEP	0.842735	0.77749	0.913456	3.15994e-05
ENPP2	0.830366	0.759476	0.907874	4.45175e-05
ENPP4	0.63049	0.545014	0.72937	5.45097e-10
EPAS1	0.705438	0.630133	0.789743	1.37645e-09
EPB41L4A	0.63854	0.552565	0.737891	1.20483e-09
EPHA4	0.681701	0.592804	0.783928	7.6702e-08
ESM1	0.817803	0.745826	0.896726	1.87775e-05
EVC	0.732277	0.64996	0.82502	3.03315e-07
F2RL1	0.738819	0.670061	0.814634	1.25208e-09
FAAH	0.681657	0.588533	0.789516	3.1653e-07
FAM50B	0.686316	0.596723	0.789361	1.33437e-07
FAM84B	0.669643	0.576854	0.777357	1.36822e-07
FARP1	0.677108	0.578474	0.79256	1.20852e-06
FAT4	0.632547	0.539569	0.741547	1.63975e-08
FDCSP	1.17873	1.10045	1.26258	2.72952e-06
FGD5	0.691535	0.613098	0.780008	1.91581e-09
FLT1	0.776932	0.707883	0.852715	1.06558e-07
FLT4	0.769675	0.677962	0.873795	5.25493e-05
FMO2	0.8474	0.778061	0.922919	0.000143767
FOSB	0.891048	0.834516	0.95141	0.000561862
FUT6	0.763592	0.699166	0.833955	2.00543e-09
FZD1	0.803691	0.720855	0.896046	8.22654e-05
FZD4	0.697353	0.611978	0.794638	6.30856e-08
FZD5	0.697703	0.604456	0.805336	8.75889e-07
GALNT15	0.731766	0.654691	0.817915	3.80818e-08
GFPT2	1.36068	1.24104	1.49185	5.42734e-11
GLYAT	0.846531	0.794121	0.9024	3.23174e-07
GPRC5A	1.20243	1.10723	1.3058	1.18377e-05
GRB10	0.647404	0.557297	0.75208	1.301e-08
GRIK3	0.818512	0.727202	0.921288	0.000905322
HAO2	0.819538	0.763921	0.879204	2.85037e-08
HIPK2	0.66935	0.584356	0.766707	6.86856e-09
HMGCS2	0.840702	0.786282	0.898888	3.7366e-07
HNMT	0.619337	0.527375	0.727335	5.15742e-09
HPN	0.805199	0.735455	0.881558	2.7709e-06
HRH2	0.789806	0.720778	0.865444	4.25988e-07
HSD11B2	0.787524	0.713452	0.869286	2.14239e-06
IGF1R	0.634755	0.539679	0.746581	4.01958e-08
IGF2BP2	1.30571	1.18129	1.44323	1.78017e-07
IGFBP1	1.12505	1.07088	1.18196	2.86779e-06
IL20RB	1.19972	1.13076	1.27289	1.65243e-09
ITGA6	0.619489	0.544719	0.704522	2.94741e-13
ITGA8	0.656044	0.580301	0.741673	1.64619e-11
ITGB8	0.831744	0.745564	0.927885	0.000963054
KCNAB1	0.660507	0.567393	0.768902	8.8192e-08
KCNJ16	0.838966	0.774848	0.908391	1.50075e-05
KCNN3	0.601231	0.519772	0.695457	7.42261e-12
KDR	0.7427	0.678588	0.812868	1.0605e-10
KIAA1147	0.673809	0.590285	0.769151	5.00209e-09
KIAA1671	0.635032	0.545037	0.739887	5.75793e-09
KIF26A	0.781707	0.678527	0.900577	0.00064988
KL	0.749925	0.689926	0.815141	1.34219e-11
KLF6	0.686319	0.597749	0.788012	9.32336e-08
KLF9	0.631534	0.546901	0.729263	3.83264e-10
KSR1	0.807159	0.720331	0.904452	0.000224749
LBP	1.12694	1.0748	1.18161	7.65049e-07
LDB2	0.72217	0.64592	0.807421	1.08274e-08
LGALS2	0.8506	0.794665	0.910472	3.12394e-06
LGR4	0.67047	0.58071	0.774104	4.99095e-08
LMBRD1	0.651243	0.5587	0.759115	4.15218e-08
LMNB1	1.41871	1.15317	1.74541	0.000940379
LRRK2	0.800962	0.72736	0.882012	6.39761e-06
MAML2	0.755071	0.665475	0.856731	1.30438e-05
MAOB	0.864599	0.801743	0.932382	0.000158074
MAT1A	1.28921	1.17522	1.41425	7.52239e-08
MAT2A	0.751844	0.655297	0.862616	4.75307e-05
MB21D2	0.670242	0.566789	0.792578	2.90185e-06
METTL24	0.615223	0.529217	0.715205	2.57143e-10
MICAL3	0.747529	0.643953	0.867766	0.000131405
MIOX	0.879089	0.828645	0.932602	1.91777e-05
MMRN2	0.704372	0.626822	0.791516	3.89523e-09
MOAP1	0.543102	0.444989	0.662846	1.91321e-09
MOCOS	1.51287	1.3407	1.70715	1.86209e-11
MT1X	1.17315	1.07835	1.27627	0.000203325
MT2A	1.27575	1.14376	1.42298	1.23968e-05
MUT	0.590716	0.499174	0.699046	8.92452e-10
MXI1	0.697977	0.598875	0.813479	4.18178e-06
MYCT1	0.709039	0.625252	0.804054	8.36855e-08
MYL3	0.767407	0.698295	0.843358	3.83951e-08
MYLIP	0.660506	0.567862	0.768264	7.49641e-08
MYO9A	0.628983	0.535313	0.739044	1.74552e-08
NAT8	0.889855	0.849758	0.931844	7.0243e-07
NAT8B	0.813161	0.754178	0.876756	7.30969e-08
NMU	1.25562	1.12856	1.397	2.8942e-05
NOTCH4	0.79068	0.698575	0.894928	0.000201795
NUMB	0.629885	0.516639	0.767956	4.8559e-06
OSBPL1A	0.576364	0.489996	0.677955	2.88249e-11
P2RY8	0.673525	0.590277	0.768512	4.31884e-09
PAEP	1.16763	1.10601	1.23268	2.1095e-08
PBX1	0.715645	0.626787	0.817099	7.56809e-07
PDE2A	0.713337	0.630394	0.807194	8.50024e-08
PDE7B	0.623194	0.526747	0.737301	3.53779e-08
PDGFD	0.700924	0.633622	0.775375	5.21944e-12
PDZD2	0.72943	0.645709	0.824005	3.93503e-07
PER2	0.73524	0.631752	0.855682	7.07871e-05
PI3	1.21186	1.13178	1.2976	3.61286e-08
PIK3R3	0.631855	0.545548	0.731816	8.97586e-10
PITPNC1	0.63022	0.535705	0.741411	2.56184e-08
PKLR	0.830173	0.764529	0.901453	9.49078e-06
PKP3	1.23915	1.13905	1.34805	6.05795e-07
PLOD2	1.27449	1.10348	1.47199	0.000968417
PLS1	0.678433	0.60915	0.755596	1.67663e-12
PODXL	0.695005	0.623403	0.774831	5.42567e-11
PPFIBP1	0.709636	0.617043	0.816122	1.52144e-06
PPP1R1A	1.17253	1.10573	1.24336	1.04524e-07
PRAME	1.19168	1.105	1.28515	5.32971e-06
PRKD1	0.623221	0.52684	0.737235	3.46112e-08
PRUNE2	0.810139	0.747044	0.878563	3.58885e-07
PSAT1	1.24923	1.14631	1.3614	3.92663e-07
PTAR1	0.659175	0.556592	0.780664	1.3724e-06
PTPRB	0.662088	0.594982	0.736764	3.95038e-14
PTPRH	1.35126	1.23252	1.48145	1.40977e-10
PTPRM	0.778623	0.684261	0.885999	0.000146875
RAB17	0.648572	0.568957	0.739327	9.19214e-11
RAPGEF2	0.644387	0.552865	0.751058	1.87941e-08
RAPGEF4	0.663095	0.58162	0.755984	8.14956e-10
RARRES1	1.1947	1.09666	1.3015	4.66347e-05
RAVER2	0.575087	0.479605	0.689577	2.33894e-09
RCBTB2	0.619732	0.526572	0.729375	8.57416e-09
RGL1	0.751325	0.664228	0.849842	5.4125e-06
RGS5	0.831076	0.762048	0.906357	2.88502e-05
RHOB	0.719531	0.643849	0.804108	6.43643e-09
RIMKLA	0.704994	0.620232	0.801339	8.86179e-08
RIPK4	0.737273	0.644961	0.842799	7.97644e-06
ROBO4	0.722861	0.637985	0.819028	3.53044e-07
S1PR1	0.703549	0.632549	0.782517	9.27377e-11
SAA1	1.14278	1.09705	1.1904	1.49175e-10
SALL1	0.707358	0.635108	0.787826	3.01078e-10
SCGB1D2	0.765705	0.677746	0.865081	1.80396e-05
SEMA5B	0.859868	0.786886	0.939619	0.00084925
SESTD1	0.618377	0.521218	0.733646	3.55824e-08
SGCB	0.660235	0.574833	0.758325	4.24433e-09
SGK1	0.738308	0.646561	0.843073	7.41761e-06
SHE	0.619795	0.531277	0.723062	1.17218e-09
SIPA1L1	0.69449	0.592449	0.814105	6.90612e-06
SLC16A4	0.816293	0.74273	0.897142	2.52499e-05
SLC17A3	0.899661	0.854833	0.946841	5.0226e-05
SLC22A11	0.836132	0.781848	0.894185	1.73644e-07
SLC23A3	0.865415	0.800113	0.936047	0.000305012
SLC25A30	0.660874	0.551161	0.792426	7.75478e-06
SLC25A48	0.734752	0.648361	0.832655	1.36867e-06
SLC38A5	1.23908	1.15671	1.32732	1.00891e-09
SLC39A5	0.856795	0.801283	0.916153	6.11731e-06
SLC47A1	0.831864	0.783476	0.88324	1.73747e-09
SLC4A3	1.31163	1.16532	1.47631	6.94468e-06
SLC4A4	0.789397	0.719285	0.866343	6.25213e-07
SLC5A1	0.843383	0.786731	0.904114	1.57701e-06
SLC5A10	0.820142	0.758868	0.886364	5.59427e-07
SLC5A12	0.844015	0.791374	0.900158	2.45374e-07
SLC6A13	0.865193	0.816228	0.917095	1.10759e-06
SLCO2A1	0.729621	0.665813	0.799545	1.46749e-11
SLPI	1.12836	1.07506	1.18431	1.00261e-06
SMIM24	0.755695	0.701966	0.813536	9.76061e-14
SNRK	0.637612	0.542105	0.749946	5.46177e-08
SNX30	0.622667	0.533688	0.726481	1.72796e-09
SOCS3	1.2387	1.10329	1.39073	0.000289844
SOWAHC	0.596617	0.505905	0.703595	8.37105e-10
SPAG9	0.678534	0.568689	0.809596	1.6764e-05
SPARCL1	0.785845	0.707035	0.873439	7.83582e-06
SPTBN1	0.623814	0.539782	0.720927	1.63142e-10
ST6GALNAC3	0.577993	0.48153	0.69378	3.99682e-09
STARD8	0.632716	0.542513	0.737918	5.45144e-09
STEAP2	0.774213	0.679393	0.882266	0.000123468
STK32B	0.710849	0.640686	0.788697	1.21985e-10
STON1	0.68764	0.5885	0.803481	2.4236e-06
STXBP1	0.766881	0.675631	0.870455	4.01813e-05
SUCLA2	0.58789	0.500371	0.690716	1.05218e-10
SUCNR1	0.81134	0.720492	0.913644	0.000559404
TBL1X	0.668353	0.566513	0.7885	1.77771e-06
TEK	0.645826	0.576408	0.723605	4.8496e-14
TFAP2A	1.20847	1.10067	1.32683	7.12289e-05
TFEC	0.796143	0.718647	0.881996	1.28194e-05
TGFBR3	0.662274	0.566204	0.774643	2.55843e-07
TIMP3	0.668598	0.593915	0.752672	2.71163e-11
TLL1	0.719589	0.63125	0.820291	8.46751e-07
TLR3	0.778822	0.698931	0.867844	5.98699e-06
TM4SF18	0.726041	0.648165	0.813274	3.19605e-08
TM7SF3	0.690302	0.591848	0.805135	2.35103e-06
TMCC3	0.619443	0.536866	0.714721	5.34463e-11
TMEM171	0.746015	0.669269	0.831561	1.22252e-07
TMEM200A	0.831474	0.74608	0.926642	0.000844069
TMEM72	0.835243	0.766538	0.910105	3.94377e-05
TMTC1	0.690796	0.605658	0.787901	3.54305e-08
TMTC2	0.717348	0.623032	0.825942	3.85878e-06
TNFRSF19	0.75979	0.681528	0.84704	7.30516e-07
TNFSF13	0.668633	0.573352	0.779749	2.87181e-07
TNNT1	1.27806	1.19041	1.37216	1.30019e-11
TNS1	0.703877	0.623851	0.794169	1.18075e-08
TOM1L1	0.633458	0.549135	0.73073	3.74629e-10
TOP2A	1.39052	1.18287	1.63463	6.46579e-05
TRNP1	1.26932	1.1491	1.40213	2.63632e-06
TSHZ1	0.741026	0.6363	0.862989	0.000115515
TSPAN12	0.803942	0.729017	0.886567	1.23075e-05
TSPYL1	0.59539	0.508707	0.696845	1.05309e-10
TTC28	0.697735	0.589618	0.825678	2.79172e-05
UBE2C	1.52092	1.3724	1.68552	1.26524e-15
UCHL1	1.17353	1.09092	1.2624	1.73643e-05
VWF	0.755979	0.687214	0.831623	8.96515e-09
WDFY3	0.63284	0.530776	0.75453	3.41877e-07
WLS	0.696276	0.616346	0.786573	5.93078e-09
ZNF33B	0.642684	0.54028	0.764498	5.96471e-07
ZNF366	0.625831	0.544128	0.719801	5.16008e-11
ZNF395	0.803859	0.71261	0.906792	0.000382979
ZNF462	0.701953	0.594355	0.82903	3.06504e-05
ZNF697	0.639879	0.535443	0.764684	9.05736e-07
ZNF704	0.630407	0.547472	0.725905	1.44498e-10
